# Supplementary material for: Shifts in Metabolic Biomarkers Related to Cardiovascular Disease and Diabetes from 2013 to 2023: A Decade of Change, Including the COVID-19 Era
Source: Research Square preprint supplement (doi:10.21203/rs.3.rs-5704576/v1), 2025-01-02
Supplement: Supplementary file 1 [file faecf2b22b872ecd6f638893.docx]

Supplementary Table 1. Geometric Mean (95% CI) and P-values for Trends in Body Mass Index, Waist Circumference, and Body Fat Percentage by Subgroups.

| **Biomarker** | **Stratum** | **Level** | **2013-2014** | **2015-2016** | **2017-2020** | **2021-2023** | **P for trend** | **P for interaction** |
| --- | --- | --- | --- | --- | --- | --- | --- | --- |
| Body mass index | Age | Elderly | 28.17 (27.32, 29.01) | 29.12 (28.27, 29.97) | 29.56 (28.82, 30.3) | 29.15 (28.69, 29.6) | 0.049 | 0.737 |
| Non-Elderly | 28.62 (28.1, 29.14) | 28.93 (28.42, 29.45) | 29.65 (29.17, 30.13) | 29.51 (28.82, 30.19) | 0.011 |
| Race | Mexican American | 29.23 (28.6, 29.86) | 29.86 (29.28, 30.44) | 30.84 (29.99, 31.7) | 30.61 (28.79, 32.43) | 0.038 | 0.528 |
| Non-Hispanic Black | 29.94 (29.29, 30.59) | 29.91 (28.9, 30.92) | 31.09 (30.34, 31.84) | 31.23 (29.65, 32.81) | 0.047 |
| Non-Hispanic White | 28.67 (28.14, 29.19) | 29.04 (28.45, 29.63) | 29.48 (28.92, 30.04) | 29.43 (28.88, 29.98) | 0.027 |
| Other Hispanic | 28.27 (26.82, 29.73) | 29.12 (27.69, 30.55) | 29.87 (29.12, 30.62) | 29.65 (28.67, 30.62) | 0.109 |
| Other Race - Including Multi-Racial | 24.87 (24.16, 25.58) | 26.42 (25.18, 27.66) | 27.93 (26.84, 29.03) | 27 (25.96, 28.04) | 0.003 |
| Gender | Female | 29.08 (28.56, 29.61) | 28.95 (28.28, 29.62) | 30.12 (29.45, 30.78) | 29.63 (28.92, 30.34) | 0.044 | 0.163 |
| Male | 27.99 (27.55, 28.43) | 28.99 (28.45, 29.53) | 29.15 (28.53, 29.78) | 29.21 (28.5, 29.92) | 0.005 |
| Education | College or above | 27.71 (26.98, 28.45) | 28.52 (27.65, 29.39) | 28.61 (28.01, 29.2) | 28.09 (27.43, 28.75) | 0.526 | 0.026 |
| High school graduate | 29.45 (28.93, 29.97) | 29.82 (28.63, 31) | 30.05 (29.29, 30.8) | 30.1 (28.99, 31.2) | 0.306 |
| Less than high school | 26.92 (26.33, 27.51) | 27.44 (26.76, 28.11) | 29.87 (29.04, 30.69) | 29.71 (28.74, 30.67) | <0.0001 |
| Some college or associates degree | 30.06 (29.28, 30.83) | 29.93 (29.01, 30.85) | 30.34 (29.65, 31.04) | 30.49 (30.04, 30.93) | 0.264 |
| Family poverty-to-income ratio | >=0,<=1 | 28.75 (28.28, 29.23) | 28.97 (28.24, 29.7) | 31.02 (30.01, 32.03) | 29.82 (28.79, 30.86) | 0.002 | 0.003 |
| >1,<=3 | 29.41 (28.74, 30.08) | 28.79 (28.07, 29.52) | 30.3 (29.62, 30.98) | 29.87 (29.44, 30.31) | 0.021 |
| >3 | 27.84 (27.27, 28.4) | 29.11 (28.47, 29.74) | 28.95 (28.51, 29.39) | 29.07 (28.25, 29.88) | 0.033 |
| Waist circumference | Age | Elderly | 101.43 (99.26, 103.6) | 103.17 (101.3, 105.04) | 103.8 (101.91, 105.7) | 102.9 (101.94, 103.86) | 0.23 | 0.849 |
| Non-Elderly | 96.85 (95.72, 97.98) | 98.28 (97.02, 99.54) | 99.61 (98.33, 100.88) | 99.31 (97.66, 100.96) | 0.006 |
| Race | Mexican American | 97.93 (95.58, 100.28) | 99.09 (97.56, 100.62) | 101.13 (99.66, 102.61) | 101.08 (96.21, 105.95) | 0.111 | 0.754 |
| Non-Hispanic Black | 98.02 (96.32, 99.72) | 98.33 (95.85, 100.8) | 101.3 (99.89, 102.71) | 100.37 (96.09, 104.64) | 0.116 |
| Non-Hispanic White | 98.8 (97.68, 99.92) | 100.42 (98.93, 101.91) | 101.12 (99.62, 102.62) | 101.24 (99.99, 102.49) | 0.005 |
| Other Hispanic | 95.39 (91.41, 99.38) | 97.15 (93.85, 100.45) | 98.55 (96.36, 100.74) | 98.41 (96.11, 100.72) | 0.172 |
| Other Race - Including Multi-Racial | 88.05 (86.28, 89.81) | 92.63 (89.86, 95.41) | 95.3 (92.49, 98.12) | 94.21 (91.27, 97.16) | 0.002 |
| Gender | Female | 96.14 (95.03, 97.25) | 96.84 (95.17, 98.51) | 98.81 (97.52, 100.1) | 97.41 (95.69, 99.13) | 0.073 | 0.186 |
| Male | 99.15 (98.16, 100.14) | 101.68 (100.2, 103.15) | 101.98 (100.22, 103.75) | 102.97 (101.13, 104.81) | <0.001 |
| Education | College or above | 96.43 (94.6, 98.26) | 98.88 (96.31, 101.46) | 97.9 (96.25, 99.55) | 96.57 (95.22, 97.92) | 0.801 | < 0.001 |
| High school graduate | 99.96 (98.99, 100.93) | 101.56 (99.05, 104.07) | 101.83 (100.02, 103.64) | 102.32 (99.53, 105.1) | 0.154 |
| Less than high school | 92.06 (90.32, 93.8) | 93.28 (91.37, 95.19) | 100.93 (99.05, 102.81) | 101.43 (99.23, 103.62) | <0.0001 |
| Some college or associates degree | 101.74 (100.18, 103.29) | 102.18 (99.78, 104.58) | 101.77 (99.98, 103.56) | 102.36 (101.12, 103.59) | 0.705 |
| Family poverty-to-income ratio | >=0,<=1 | 97.08 (95.41, 98.74) | 97.67 (96.1, 99.24) | 102.51 (100.31, 104.71) | 100.39 (98.04, 102.74) | <0.001 | < 0.001 |
| >1,<=3 | 99.08 (97.73, 100.44) | 98.34 (96.61, 100.07) | 101.86 (100.17, 103.56) | 101.11 (99.93, 102.29) | 0.001 |
| >3 | 96.77 (95.5, 98.04) | 100.36 (98.55, 102.17) | 99.08 (97.79, 100.37) | 99.42 (97.55, 101.29) | 0.091 |
| Body fat percentage | Age | Elderly | 37.18 (36.24, 38.12) | 38.29 (37.57, 39.01) | 38.41 (37.34, 39.49) | 38.2 (37.61, 38.79) | 0.104 | 0.239 |
| Non-Elderly | 32.86 (32.19, 33.52) | 33.58 (32.89, 34.27) | 34.81 (34.09, 35.52) | 34.96 (34.03, 35.89) | <0.0001 |
| Race | Mexican American | 33.55 (32.49, 34.6) | 34.39 (33.03, 35.75) | 35.98 (34.91, 37.05) | 35.45 (33.1, 37.81) | 0.027 | 0.481 |
| Non-Hispanic Black | 34.93 (33.84, 36.03) | 35.34 (33.98, 36.71) | 37.28 (36.2, 38.36) | 38.12 (35.96, 40.28) | 0.002 |
| Non-Hispanic White | 33.93 (33.33, 34.52) | 34.88 (34.22, 35.54) | 35.4 (34.39, 36.41) | 35.92 (35.16, 36.69) | <0.001 |
| Other Hispanic | 33.09 (31.25, 34.93) | 33.74 (31.81, 35.67) | 36.24 (34.78, 37.7) | 35.59 (34.43, 36.76) | 0.008 |
| Other Race - Including Multi-Racial | 29.2 (28.25, 30.16) | 30.99 (29, 32.97) | 33.29 (31.86, 34.73) | 32.54 (30.92, 34.16) | 0.001 |
| Gender | Female | 39.74 (39.22, 40.25) | 40.04 (39.34, 40.74) | 41.56 (40.88, 42.24) | 41.33 (40.43, 42.22) | <0.001 | 0.392 |
| Male | 27.28 (26.77, 27.78) | 28.64 (27.96, 29.31) | 29.4 (28.48, 30.32) | 29.69 (28.77, 30.61) | <0.0001 |
| Education | College or above | 33.3 (32.17, 34.42) | 34.57 (33.19, 35.96) | 34.26 (33.03, 35.49) | 34.39 (33.32, 35.46) | 0.287 | < 0.001 |
| High school graduate | 34.53 (33.52, 35.54) | 35.55 (34.25, 36.85) | 35.94 (34.87, 37.02) | 36.23 (34.71, 37.76) | 0.074 |
| Less than high school | 30.13 (28.97, 31.29) | 30.66 (29.54, 31.78) | 35.6 (34.59, 36.62) | 35.49 (33.48, 37.51) | <0.0001 |
| Some college or associates degree | 36.03 (35.24, 36.82) | 36.38 (34.91, 37.85) | 36.41 (35.4, 37.41) | 36.92 (36.11, 37.73) | 0.192 |
| Family poverty-to-income ratio | >=0,<=1 | 33.39 (32.8, 33.98) | 34.47 (33.05, 35.89) | 37.17 (35.89, 38.45) | 36.66 (34.98, 38.34) | <0.0001 | 0.002 |
| >1,<=3 | 34.69 (33.76, 35.63) | 33.77 (33.05, 34.49) | 36.24 (35.39, 37.09) | 36.24 (35.44, 37.03) | <0.001 |
| >3 | 32.86 (31.98, 33.74) | 35.02 (34.14, 35.89) | 34.69 (33.62, 35.75) | 35.13 (34.09, 36.17) | 0.006 |

Supplementary Table 2. Geometric Mean (95% CI) and *P*-values for Trends in Systolic Blood Pressure, Diastolic Blood Pressure, Pulse Rate, and Estimated Pulse Wave Velocity by Subgroups.

| **Risk factor** | **Stratum** | **Level** | **2013-2014** | **2015-2016** | **2017-2020** | **2021-2023** | **P for trend** | **P for interaction** |
| --- | --- | --- | --- | --- | --- | --- | --- | --- |
| Diastolic blood pressure | Age | Elderly | 65.58 (63.92, 67.25) | 65.66 (63.58, 67.74) | 71.51 (70.55, 72.47) | 71.22 (70.1, 72.35) | 0.058 | 0.089 |
| Non-Elderly | 68.5 (68.02, 68.99) | 69.47 (68.38, 70.56) | 74.38 (73.64, 75.11) | 75.02 (74.11, 75.92) | 0.685 |
| Race | Mexican American | 66.62 (65.74, 67.5) | 68.56 (67.18, 69.93) | 72.48 (71.24, 73.72) | 74.77 (73.31, 76.23) | 0.263 | 0.927 |
| Non-Hispanic Black | 68.16 (66.74, 69.58) | 69.55 (67.59, 71.51) | 77.2 (76.02, 78.38) | 78.71 (76.29, 81.14) | 0.551 |
| Non-Hispanic White | 68.32 (67.43, 69.2) | 68.81 (67.61, 70.01) | 73.57 (72.66, 74.47) | 73.58 (72.44, 74.73) | 0.905 |
| Other Hispanic | 66.11 (64.36, 67.85) | 66.33 (64.41, 68.26) | 73.26 (70.68, 75.83) | 73.54 (72.32, 74.76) | 0.592 |
| Other Race - Including Multi-Racial | 68.15 (67.26, 69.03) | 69.31 (68, 70.62) | 73.89 (72.62, 75.15) | 74.02 (72.58, 75.45) | 0.696 |
| Gender | Female | 67.2 (66.62, 67.77) | 67.45 (66.5, 68.41) | 72.68 (71.85, 73.52) | 73.06 (71.94, 74.19) | 0.101 | 0.006 |
| Male | 68.85 (67.93, 69.76) | 70.11 (68.67, 71.54) | 74.99 (74.01, 75.97) | 75.35 (74.32, 76.38) | 0.005 |
| Education | College or above | 69.3 (68.52, 70.07) | 70.15 (68.94, 71.36) | 72.87 (71.96, 73.77) | 72.66 (71.23, 74.08) | 0.081 | < 0.0001 |
| High school graduate | 69.48 (68.5, 70.46) | 68.87 (67.26, 70.47) | 74.13 (73.04, 75.23) | 74.87 (73.1, 76.65) | 0.683 |
| Less than high school | 64.15 (63.14, 65.17) | 65.06 (63.58, 66.54) | 74.41 (73.06, 75.76) | 75.17 (73.03, 77.3) | <0.0001 |
| Some college or associates degree | 68.93 (68.09, 69.78) | 69.98 (68.36, 71.59) | 74.46 (73.21, 75.72) | 75.2 (74.17, 76.24) | 0.051 |
| Family poverty-to-income ratio | >=0,<=1 | 67.65 (66.25, 69.05) | 67.04 (65.59, 68.49) | 74.67 (73.53, 75.8) | 74.87 (72.96, 76.79) | 0.213 | 0.39 |
| >1,<=3 | 67.49 (66.02, 68.96) | 67.83 (66.86, 68.8) | 73.86 (73, 74.73) | 74.35 (73.57, 75.14) | 0.159 |
| >3 | 68.52 (67.79, 69.24) | 69.99 (68.74, 71.25) | 73.66 (72.76, 74.55) | 73.91 (72.77, 75.06) | 0.458 |
| Systolic blood pressure | Age | Elderly | 131.45 (128.95, 133.94) | 131.84 (128.93, 134.75) | 131.83 (130.37, 133.3) | 128.32 (126.54, 130.1) | <0.0001 | 0.663 |
| Non-Elderly | 117.22 (116.06, 118.38) | 119.39 (118.65, 120.14) | 118.14 (117.26, 119.02) | 117.94 (117.03, 118.84) | <0.0001 |
| Race | Mexican American | 117.33 (115.16, 119.5) | 120.37 (118.44, 122.3) | 118.75 (116.84, 120.67) | 120 (116.87, 123.12) | <0.0001 | 0.004 |
| Non-Hispanic Black | 124.92 (123.03, 126.82) | 125.8 (123.98, 127.62) | 126.14 (123.61, 128.67) | 125.92 (122.59, 129.24) | <0.0001 |
| Non-Hispanic White | 119.56 (118.19, 120.92) | 121.73 (120.63, 122.83) | 120.47 (119.1, 121.83) | 120.07 (119.24, 120.89) | <0.0001 |
| Other Hispanic | 116.53 (114.24, 118.81) | 119.1 (116.45, 121.75) | 120.31 (117.42, 123.2) | 117.48 (116.45, 118.52) | <0.0001 |
| Other Race - Including Multi-Racial | 117.87 (115.97, 119.77) | 120.32 (116.77, 123.87) | 118.92 (117.21, 120.63) | 119.18 (117.22, 121.15) | <0.0001 |
| Gender | Female | 118.24 (116.97, 119.51) | 120.27 (119.11, 121.44) | 117.96 (116.45, 119.47) | 117.41 (116.17, 118.66) | <0.0001 | 0.705 |
| Male | 121.06 (119.87, 122.25) | 123.28 (122.15, 124.41) | 123.46 (122.57, 124.36) | 123.27 (122.41, 124.12) | <0.0001 |
| Education | College or above | 118.59 (117.11, 120.06) | 120.75 (119.08, 122.43) | 118.23 (116.45, 120.02) | 117.37 (115.64, 119.09) | <0.0001 | < 0.0001 |
| High school graduate | 121.47 (119.88, 123.06) | 125.15 (123.85, 126.44) | 122.62 (120.51, 124.73) | 123.17 (121.19, 125.16) | <0.0001 |
| Less than high school | 117.56 (115.77, 119.34) | 117.71 (115.91, 119.51) | 126.07 (123.7, 128.45) | 124.55 (121.81, 127.3) | <0.0001 |
| Some college or associates degree | 121.12 (119.56, 122.68) | 123.26 (121.43, 125.08) | 120.08 (118.65, 121.5) | 120.14 (118.91, 121.36) | <0.0001 |
| Family poverty-to-income ratio | >=0,<=1 | 119.47 (117.71, 121.23) | 121.08 (119.2, 122.96) | 120.34 (118.84, 121.84) | 121.79 (119.06, 124.52) | <0.0001 | 0.004 |
| >1,<=3 | 120 (118.86, 121.14) | 121.6 (120.12, 123.07) | 121.53 (120.04, 123.03) | 121.3 (120.25, 122.36) | <0.0001 |
| >3 | 119.42 (117.77, 121.07) | 122.06 (120.61, 123.51) | 120.28 (119.15, 121.41) | 119.28 (118.06, 120.5) | <0.0001 |
| Pulse rate | Age | Elderly | 67.9 (66.9, 68.9) | 69.6 (68.23, 70.97) | 66.51 (65.29, 67.73) | 67.72 (66.61, 68.84) | 0.117 | 0.027 |
| Non-Elderly | 73.16 (72.02, 74.3) | 73 (72.35, 73.65) | 68.84 (68.2, 69.49) | 71.42 (70.84, 72) | <0.0001 |
| Race | Mexican American | 72.24 (70.68, 73.81) | 72.55 (71.76, 73.34) | 66.99 (65.3, 68.69) | 68.33 (66.16, 70.5) | <0.0001 | 0.449 |
| Non-Hispanic Black | 71.32 (69.72, 72.91) | 72.35 (71.47, 73.23) | 68.07 (66.77, 69.38) | 70.22 (68.21, 72.22) | 0.038 |
| Non-Hispanic White | 72.37 (70.95, 73.79) | 72.23 (71.37, 73.08) | 68.68 (68.02, 69.35) | 70.77 (69.76, 71.78) | 0.001 |
| Other Hispanic | 74.22 (72.92, 75.51) | 73.47 (72.5, 74.44) | 68.02 (66.44, 69.6) | 72.29 (70.68, 73.9) | 0.009 |
| Other Race - Including Multi-Racial | 71.45 (70.05, 72.84) | 72.36 (70.54, 74.19) | 68.43 (66.63, 70.23) | 69.96 (68.69, 71.23) | 0.009 |
| Gender | Female | 73.95 (72.75, 75.15) | 73.92 (73.24, 74.61) | 70.28 (69.31, 71.24) | 72.66 (71.76, 73.55) | 0.001 | 0.568 |
| Male | 70.55 (69.36, 71.74) | 70.72 (69.93, 71.51) | 66.53 (65.68, 67.38) | 68.41 (67.85, 68.97) | <0.0001 |
| Education | College or above | 71.05 (69.74, 72.37) | 70.79 (69.5, 72.08) | 67.9 (66.65, 69.15) | 69.02 (68.15, 69.89) | <0.001 | 0.103 |
| High school graduate | 71.83 (70.14, 73.53) | 71.83 (70.44, 73.22) | 69.1 (68.01, 70.19) | 71.27 (69.73, 72.82) | 0.199 |
| Less than high school | 73.52 (72.01, 75.03) | 73.61 (72.82, 74.4) | 66.82 (65.66, 67.97) | 71.17 (69.34, 73.01) | <0.0001 |
| Some college or associates degree | 72.71 (71.52, 73.9) | 73.37 (71.85, 74.89) | 68.92 (67.52, 70.32) | 71.86 (70.95, 72.76) | 0.003 |
| Family poverty-to-income ratio | >=0,<=1 | 73.85 (72.39, 75.31) | 74.58 (73.34, 75.83) | 69.89 (68.41, 71.36) | 72.51 (71.28, 73.74) | 0.004 | 0.649 |
| >1,<=3 | 72.79 (71.51, 74.07) | 72.33 (71.39, 73.28) | 69.54 (68.26, 70.81) | 71.33 (70.44, 72.21) | 0.004 |
| >3 | 71.33 (69.97, 72.68) | 71.69 (70.71, 72.67) | 67.42 (66.61, 68.23) | 69.74 (69.1, 70.38) | <0.001 |
| Estimated pulse wave velocity | Age | Elderly | 11.31 (11.14, 11.48) | 11.11 (10.94, 11.27) | 11.43 (11.27, 11.59) | 11.45 (11.34, 11.57) | 0.017 | 0.077 |
| Non-Elderly | 7.19 (7.11, 7.27) | 7.34 (7.26, 7.43) | 7.48 (7.37, 7.58) | 7.54 (7.45, 7.63) | <0.0001 |
| Race | Mexican American | 7.12 (6.92, 7.33) | 7.37 (7.02, 7.71) | 7.46 (7.22, 7.7) | 7.69 (7.46, 7.93) | 0.001 | 0.64 |
| Non-Hispanic Black | 7.79 (7.59, 7.98) | 7.81 (7.65, 7.97) | 8.33 (8.11, 8.54) | 8.49 (8.07, 8.92) | <0.001 |
| Non-Hispanic White | 8.11 (7.93, 8.29) | 8.29 (8.1, 8.47) | 8.39 (8.14, 8.63) | 8.62 (8.41, 8.83) | <0.001 |
| Other Hispanic | 7.18 (6.92, 7.43) | 7.35 (7.13, 7.57) | 7.96 (7.6, 8.31) | 7.86 (7.58, 8.13) | <0.0001 |
| Other Race - Including Multi-Racial | 7.53 (7.3, 7.76) | 7.71 (7.3, 8.13) | 7.84 (7.67, 8.02) | 8.07 (7.72, 8.42) | 0.016 |
| Gender | Female | 7.86 (7.7, 8.01) | 8.04 (7.86, 8.22) | 8.18 (7.96, 8.4) | 8.33 (8.18, 8.47) | <0.0001 | 0.712 |
| Male | 7.92 (7.78, 8.06) | 8.07 (7.92, 8.22) | 8.26 (8.08, 8.44) | 8.5 (8.3, 8.69) | <0.0001 |
| Education | College or above | 7.94 (7.66, 8.21) | 8.16 (7.88, 8.44) | 7.99 (7.74, 8.23) | 8.18 (8.01, 8.35) | 0.307 | < 0.0001 |
| High school graduate | 8.13 (7.87, 8.4) | 8.34 (8.07, 8.62) | 8.42 (8.06, 8.79) | 8.79 (8.43, 9.14) | 0.006 |
| Less than high school | 7.55 (7.34, 7.76) | 7.47 (7.26, 7.68) | 8.74 (8.42, 9.05) | 8.79 (8.38, 9.2) | <0.0001 |
| Some college or associates degree | 7.96 (7.76, 8.16) | 8.17 (7.96, 8.38) | 8.13 (7.97, 8.29) | 8.27 (8.09, 8.45) | 0.046 |
| Family poverty-to-income ratio | >=0,<=1 | 7.41 (7.26, 7.56) | 7.6 (7.35, 7.86) | 7.84 (7.65, 8.03) | 8.16 (7.9, 8.41) | <0.0001 | 0.005 |
| >1,<=3 | 7.98 (7.79, 8.16) | 7.87 (7.72, 8.03) | 8.31 (8.07, 8.55) | 8.55 (8.34, 8.76) | <0.0001 |
| >3 | 8 (7.78, 8.21) | 8.33 (8.13, 8.54) | 8.24 (8, 8.47) | 8.38 (8.2, 8.56) | 0.033 |

Supplementary Table 3. Geometric Mean (95% CI) and *P*-values for Trends in Fasting Total Cholesterol and High-Density Lipoprotein Cholesterol by Subgroups.

| **Risk factor** | **Stratum** | **Level** | **2013-2014** | **2015-2016** | **2017-2020** | **2021-2023** | **P for trend** | **P for interaction** |
| --- | --- | --- | --- | --- | --- | --- | --- | --- |
| Fasting total cholesterol | Age | Elderly | 4.81 (4.72, 4.9) | 4.95 (4.84, 5.06) | 4.76 (4.62, 4.91) | 4.66 (4.58, 4.74) | 0.002 | < 0.001 |
| Non-Elderly | 4.78 (4.72, 4.85) | 4.88 (4.8, 4.95) | 4.83 (4.73, 4.92) | 4.96 (4.89, 5.03) | 0.005 |
| Race | Mexican American | 4.73 (4.53, 4.92) | 4.72 (4.6, 4.84) | 4.79 (4.67, 4.9) | 4.86 (4.73, 5) | 0.227 | 0.379 |
| Non-Hispanic Black | 4.6 (4.51, 4.68) | 4.7 (4.52, 4.89) | 4.6 (4.5, 4.69) | 4.75 (4.61, 4.89) | 0.232 |
| Non-Hispanic White | 4.83 (4.77, 4.89) | 4.96 (4.88, 5.03) | 4.83 (4.71, 4.96) | 4.91 (4.82, 5) | 0.61 |
| Other Hispanic | 4.86 (4.72, 5) | 4.7 (4.52, 4.87) | 4.85 (4.65, 5.04) | 4.86 (4.74, 4.99) | 0.461 |
| Other Race - Including Multi-Racial | 4.66 (4.52, 4.81) | 4.89 (4.7, 5.07) | 4.91 (4.81, 5.01) | 4.94 (4.73, 5.15) | 0.055 |
| Gender | Female | 4.87 (4.8, 4.94) | 4.97 (4.89, 5.06) | 4.9 (4.8, 5) | 4.96 (4.89, 5.03) | 0.319 | 0.964 |
| Male | 4.7 (4.64, 4.76) | 4.8 (4.71, 4.9) | 4.73 (4.62, 4.84) | 4.82 (4.73, 4.92) | 0.129 |
| Education | College or above | 4.98 (4.87, 5.09) | 4.96 (4.81, 5.11) | 4.88 (4.76, 5) | 4.98 (4.91, 5.06) | 0.798 | 0.006 |
| High school graduate | 4.77 (4.66, 4.88) | 5.04 (4.9, 5.18) | 4.72 (4.57, 4.87) | 4.86 (4.76, 4.95) | 0.591 |
| Less than high school | 4.48 (4.42, 4.54) | 4.52 (4.43, 4.62) | 4.79 (4.67, 4.9) | 4.76 (4.6, 4.92) | <0.0001 |
| Some college or associates degree | 4.86 (4.77, 4.94) | 4.98 (4.83, 5.14) | 4.83 (4.7, 4.97) | 4.85 (4.75, 4.96) | 0.451 |
| Family poverty-to-income ratio | >=0,<=1 | 4.57 (4.46, 4.68) | 4.7 (4.54, 4.86) | 4.65 (4.53, 4.78) | 4.83 (4.64, 5.02) | 0.043 | 0.764 |
| >1,<=3 | 4.75 (4.66, 4.84) | 4.84 (4.74, 4.95) | 4.72 (4.6, 4.83) | 4.83 (4.75, 4.9) | 0.728 |
| >3 | 4.89 (4.83, 4.95) | 4.98 (4.89, 5.07) | 4.91 (4.78, 5.03) | 4.95 (4.87, 5.03) | 0.603 |
| High-density lipoprotein-cholesterol | Age | Elderly | 1.48 (1.42, 1.54) | 1.58 (1.48, 1.69) | 1.44 (1.39, 1.49) | 1.47 (1.45, 1.48) | 0.068 | 0.128 |
| Non-Elderly | 1.37 (1.35, 1.4) | 1.42 (1.38, 1.45) | 1.38 (1.35, 1.4) | 1.39 (1.36, 1.41) | 0.994 |
| Race | Mexican American | 1.32 (1.29, 1.35) | 1.33 (1.28, 1.38) | 1.29 (1.24, 1.34) | 1.27 (1.22, 1.33) | 0.06 | 0.308 |
| Non-Hispanic Black | 1.46 (1.42, 1.5) | 1.51 (1.46, 1.55) | 1.43 (1.39, 1.47) | 1.47 (1.42, 1.53) | 0.675 |
| Non-Hispanic White | 1.39 (1.36, 1.43) | 1.47 (1.43, 1.51) | 1.4 (1.37, 1.43) | 1.42 (1.4, 1.44) | 0.952 |
| Other Hispanic | 1.33 (1.26, 1.4) | 1.32 (1.26, 1.39) | 1.36 (1.31, 1.42) | 1.34 (1.3, 1.38) | 0.643 |
| Other Race - Including Multi-Racial | 1.41 (1.38, 1.44) | 1.41 (1.33, 1.5) | 1.37 (1.34, 1.4) | 1.4 (1.34, 1.47) | 0.667 |
| Gender | Female | 1.52 (1.49, 1.55) | 1.6 (1.53, 1.67) | 1.51 (1.48, 1.54) | 1.52 (1.49, 1.55) | 0.213 | 0.157 |
| Male | 1.26 (1.22, 1.3) | 1.29 (1.25, 1.32) | 1.26 (1.24, 1.29) | 1.28 (1.26, 1.31) | 0.586 |
| Education | College or above | 1.48 (1.44, 1.52) | 1.54 (1.49, 1.6) | 1.47 (1.43, 1.52) | 1.48 (1.45, 1.51) | 0.336 | 0.883 |
| High school graduate | 1.37 (1.31, 1.42) | 1.41 (1.34, 1.48) | 1.34 (1.3, 1.38) | 1.38 (1.34, 1.42) | 0.73 |
| Less than high school | 1.34 (1.31, 1.37) | 1.38 (1.33, 1.42) | 1.27 (1.22, 1.31) | 1.3 (1.24, 1.36) | 0.032 |
| Some college or associates degree | 1.37 (1.32, 1.42) | 1.43 (1.37, 1.49) | 1.37 (1.34, 1.41) | 1.37 (1.34, 1.39) | 0.503 |
| Family poverty-to-income ratio | >=0,<=1 | 1.33 (1.3, 1.37) | 1.35 (1.31, 1.39) | 1.3 (1.28, 1.33) | 1.39 (1.35, 1.43) | 0.282 | 0.131 |
| >1,<=3 | 1.36 (1.34, 1.38) | 1.4 (1.36, 1.44) | 1.34 (1.31, 1.36) | 1.37 (1.33, 1.42) | 0.634 |
| >3 | 1.44 (1.39, 1.48) | 1.51 (1.46, 1.57) | 1.44 (1.4, 1.48) | 1.43 (1.4, 1.45) | 0.233 |

Supplementary Table 4. Geometric Mean (95% CI) and *P*-values for Trends in Fasting Glucose, Glycohemoglobin, Fasting Insulin, and HOMA Score by Subgroups.

| **Risk factor** | **Stratum** | **Level** | **2013-2014** | **2015-2016** | **2017-2020** | **2021-2023** | **P for trend** | **P for interaction** |
| --- | --- | --- | --- | --- | --- | --- | --- | --- |
| Fasting glucose | Age | Elderly | 6.2 (5.96, 6.43) | 6.47 (6.31, 6.63) | 6.61 (6.45, 6.78) | 6.37 (6.18, 6.55) | 0.244 | 0.632 |
| Non-Elderly | 5.68 (5.6, 5.77) | 5.9 (5.82, 5.97) | 5.97 (5.86, 6.08) | 5.88 (5.76, 6) | 0.005 |
| Race | Mexican American | 5.9 (5.81, 6) | 6.17 (5.91, 6.44) | 6.45 (6.17, 6.74) | 6.64 (6.26, 7.01) | <0.0001 | 0.179 |
| Non-Hispanic Black | 5.65 (5.53, 5.77) | 6.07 (5.92, 6.22) | 6.05 (5.88, 6.22) | 6.14 (5.7, 6.58) | 0.024 |
| Non-Hispanic White | 5.77 (5.67, 5.87) | 5.98 (5.9, 6.06) | 6.03 (5.85, 6.22) | 5.92 (5.78, 6.06) | 0.081 |
| Other Hispanic | 5.81 (5.62, 6.01) | 6.17 (5.87, 6.47) | 6.02 (5.87, 6.17) | 5.95 (5.77, 6.13) | 0.807 |
| Other Race - Including Multi-Racial | 5.7 (5.48, 5.92) | 5.85 (5.71, 5.98) | 6.19 (5.99, 6.4) | 5.85 (5.64, 6.07) | 0.143 |
| Gender | Female | 5.63 (5.52, 5.73) | 5.81 (5.72, 5.91) | 5.91 (5.8, 6.01) | 5.77 (5.66, 5.89) | 0.037 | 0.5 |
| Male | 5.91 (5.81, 6.02) | 6.2 (6.11, 6.29) | 6.27 (6.1, 6.44) | 6.22 (6.06, 6.37) | 0.002 |
| Education | College or above | 5.55 (5.42, 5.68) | 5.97 (5.86, 6.08) | 5.83 (5.71, 5.94) | 5.66 (5.58, 5.75) | 0.661 | < 0.0001 |
| High school graduate | 5.82 (5.64, 6.01) | 6.16 (6.03, 6.29) | 6.36 (6.1, 6.62) | 6.16 (5.93, 6.39) | 0.021 |
| Less than high school | 5.75 (5.6, 5.89) | 5.91 (5.71, 6.12) | 6.63 (6.35, 6.91) | 6.54 (6.24, 6.85) | <0.0001 |
| Some college or associates degree | 5.96 (5.86, 6.06) | 6 (5.82, 6.17) | 5.97 (5.85, 6.1) | 6.08 (5.9, 6.26) | 0.333 |
| Family poverty-to-income ratio | >=0,<=1 | 5.79 (5.61, 5.96) | 6.03 (5.87, 6.18) | 6.28 (6.09, 6.47) | 6.01 (5.79, 6.24) | 0.015 | 0.221 |
| >1,<=3 | 5.84 (5.71, 5.97) | 5.97 (5.83, 6.12) | 6.23 (6.07, 6.39) | 6.1 (5.93, 6.26) | 0.002 |
| >3 | 5.71 (5.6, 5.82) | 6.02 (5.91, 6.13) | 5.96 (5.79, 6.13) | 5.91 (5.76, 6.07) | 0.096 |
| Fasting insulin | Age | Elderly | 12.15 (10.38, 13.91) | 15.08 (13.73, 16.42) | 15.74 (13.27, 18.22) | 14.24 (12.31, 16.16) | 0.157 | 0.253 |
| Non-Elderly | 12.98 (11.67, 14.29) | 13.07 (12.11, 14.04) | 13.51 (12.2, 14.82) | 13.92 (12.12, 15.72) | 0.353 |
| Race | Mexican American | 15.38 (13.61, 17.15) | 15.32 (13.08, 17.57) | 19.83 (13.47, 26.2) | 16.2 (12.29, 20.11) | 0.226 | 0.365 |
| Non-Hispanic Black | 13.89 (12.53, 15.26) | 14.22 (12.8, 15.65) | 13.98 (12.2, 15.75) | 14.4 (12.38, 16.42) | 0.763 |
| Non-Hispanic White | 12.08 (11.11, 13.06) | 13.25 (12.27, 14.23) | 13.45 (11.85, 15.06) | 13.57 (12.01, 15.13) | 0.114 |
| Other Hispanic | 17.98 (8.87, 27.08) | 13.86 (11.38, 16.34) | 13.05 (11.33, 14.76) | 17.47 (14.29, 20.65) | 0.97 |
| Other Race - Including Multi-Racial | 11.32 (9.02, 13.62) | 12.08 (10.49, 13.67) | 12.32 (11.22, 13.42) | 11.77 (10.13, 13.41) | 0.757 |
| Gender | Female | 12.13 (11.33, 12.93) | 12.45 (11.45, 13.44) | 13.76 (12.1, 15.42) | 13.4 (12.36, 14.45) | 0.024 | 0.57 |
| Male | 13.57 (11.65, 15.49) | 14.5 (13.19, 15.81) | 14.1 (12.68, 15.51) | 14.61 (12.53, 16.7) | 0.551 |
| Education | College or above | 10.01 (8.95, 11.08) | 12 (10.84, 13.16) | 11.37 (9.51, 13.24) | 12.05 (9.95, 14.15) | 0.182 | 0.368 |
| High school graduate | 12.3 (10.46, 14.14) | 14.47 (12.16, 16.79) | 16.7 (13.3, 20.1) | 15.51 (12.83, 18.19) | 0.038 |
| Less than high school | 13.96 (12.65, 15.27) | 14.19 (12.39, 16) | 14.77 (13.21, 16.33) | 15.43 (13.91, 16.95) | 0.16 |
| Some college or associates degree | 14.99 (12.73, 17.24) | 13.62 (11.69, 15.55) | 14.18 (12.43, 15.92) | 14.74 (12.7, 16.78) | 0.954 |
| Family poverty-to-income ratio | >=0,<=1 | 13.7 (11.89, 15.5) | 14.24 (12.75, 15.74) | 17.06 (12.09, 22.03) | 14.62 (11.93, 17.31) | 0.269 | 0.308 |
| >1,<=3 | 13.98 (12.69, 15.26) | 13.2 (11.95, 14.45) | 15.73 (13.86, 17.6) | 14.79 (12.74, 16.83) | 0.163 |
| >3 | 11.71 (10.17, 13.25) | 13.4 (12.36, 14.44) | 12.21 (10.75, 13.67) | 13.36 (10.93, 15.79) | 0.433 |
| Glycohemoglobin | Age | Elderly | 5.97 (5.87, 6.06) | 5.92 (5.83, 6) | 6.02 (5.94, 6.1) | 5.97 (5.88, 6.05) | 0.592 | 0.214 |
| Non-Elderly | 5.5 (5.45, 5.55) | 5.58 (5.53, 5.63) | 5.59 (5.53, 5.64) | 5.58 (5.5, 5.66) | 0.076 |
| Race | Mexican American | 5.59 (5.51, 5.68) | 5.8 (5.65, 5.94) | 5.91 (5.72, 6.11) | 6.06 (5.84, 6.28) | <0.001 | 0.118 |
| Non-Hispanic Black | 5.75 (5.69, 5.82) | 5.96 (5.88, 6.05) | 5.87 (5.79, 5.94) | 5.92 (5.71, 6.13) | 0.209 |
| Non-Hispanic White | 5.53 (5.49, 5.58) | 5.57 (5.52, 5.62) | 5.59 (5.5, 5.69) | 5.58 (5.5, 5.67) | 0.299 |
| Other Hispanic | 5.69 (5.53, 5.84) | 5.72 (5.56, 5.87) | 5.69 (5.6, 5.78) | 5.72 (5.61, 5.83) | 0.788 |
| Other Race - Including Multi-Racial | 5.61 (5.46, 5.75) | 5.63 (5.54, 5.72) | 5.75 (5.63, 5.86) | 5.66 (5.56, 5.75) | 0.351 |
| Gender | Female | 5.55 (5.48, 5.61) | 5.61 (5.54, 5.67) | 5.65 (5.59, 5.71) | 5.6 (5.52, 5.67) | 0.188 | 0.374 |
| Male | 5.61 (5.54, 5.68) | 5.68 (5.64, 5.73) | 5.69 (5.61, 5.77) | 5.74 (5.65, 5.82) | 0.025 |
| Education | College or above | 5.45 (5.36, 5.53) | 5.61 (5.54, 5.68) | 5.48 (5.43, 5.54) | 5.45 (5.39, 5.52) | 0.452 | < 0.0001 |
| High school graduate | 5.63 (5.54, 5.72) | 5.74 (5.66, 5.83) | 5.82 (5.7, 5.94) | 5.76 (5.62, 5.89) | 0.1 |
| Less than high school | 5.58 (5.51, 5.66) | 5.59 (5.47, 5.71) | 6.03 (5.89, 6.16) | 6.14 (5.96, 6.32) | <0.0001 |
| Some college or associates degree | 5.66 (5.62, 5.7) | 5.64 (5.56, 5.73) | 5.63 (5.57, 5.69) | 5.72 (5.62, 5.82) | 0.425 |
| Family poverty-to-income ratio | >=0,<=1 | 5.58 (5.48, 5.67) | 5.71 (5.57, 5.84) | 5.88 (5.76, 6) | 5.76 (5.63, 5.89) | 0.002 | 0.022 |
| >1,<=3 | 5.64 (5.57, 5.71) | 5.64 (5.56, 5.73) | 5.77 (5.7, 5.85) | 5.76 (5.68, 5.84) | 0.004 |
| >3 | 5.53 (5.48, 5.59) | 5.62 (5.57, 5.67) | 5.56 (5.48, 5.65) | 5.59 (5.5, 5.67) | 0.561 |
| Homeostatic Model Assessment of Beta Cell Function | Age | Elderly | 95.27 (85.56, 104.99) | 104.24 (93.21, 115.26) | 107.73 (88.95, 126.5) | 105.32 (92.11, 118.53) | 0.254 | 0.837 |
| Non-Elderly | 111.74 (83.23, 140.26) | 118.34 (110.31, 126.38) | 115.62 (106.36, 124.87) | 125.19 (116.78, 133.59) | 0.446 |
| Race | Mexican American | 45.09 (-165.68, 255.86) | 133.39 (120.97, 145.81) | 145.16 (124.66, 165.65) | 117.64 (103.46, 131.82) | 0.454 | 0.359 |
| Non-Hispanic Black | 149.09 (133.27, 164.91) | 129.25 (116.96, 141.54) | 119.23 (103.17, 135.29) | 129.8 (118.68, 140.92) | 0.025 |
| Non-Hispanic White | 106.96 (90.66, 123.26) | 110.64 (102.22, 119.05) | 111.2 (98.94, 123.47) | 116.88 (107.51, 126.25) | 0.331 |
| Other Hispanic | 159.35 (109.85, 208.84) | 126.21 (107.89, 144.53) | 111.29 (99.24, 123.33) | 151.06 (124.81, 177.32) | 0.85 |
| Other Race - Including Multi-Racial | 114.22 (99.33, 129.12) | 114.45 (96.33, 132.57) | 102.43 (92.73, 112.13) | 112.65 (91.12, 134.18) | 0.706 |
| Gender | Female | 125.42 (115.76, 135.07) | 114.82 (107.12, 122.53) | 119.16 (106.93, 131.4) | 120.85 (113.71, 128) | 0.645 | 0.237 |
| Male | 92.04 (45.23, 138.85) | 116.58 (105.74, 127.42) | 109.1 (98.56, 119.65) | 120.66 (108.08, 133.24) | 0.312 |
| Education | College or above | 98.68 (88.65, 108.7) | 102.63 (94, 111.26) | 99.57 (86.07, 113.08) | 110.57 (97.28, 123.86) | 0.226 | 0.728 |
| High school graduate | 92.15 (41.61, 142.7) | 113.18 (99.45, 126.9) | 122.66 (103.38, 141.94) | 130.21 (114.68, 145.75) | 0.125 |
| Less than high school | 111.61 (23.35, 199.87) | 130.73 (115.79, 145.66) | 108.72 (97.48, 119.95) | 128.77 (109.86, 147.68) | 0.861 |
| Some college or associates degree | 127.19 (111.28, 143.09) | 119.39 (106.79, 132) | 124.84 (108.36, 141.32) | 123.32 (111.79, 134.85) | 0.861 |
| Family poverty-to-income ratio | >=0,<=1 | 82.48 (-33.91, 198.87) | 129.04 (115.95, 142.14) | 127.82 (110.9, 144.75) | 128.2 (100.21, 156.18) | 0.455 | 0.555 |
| >1,<=3 | 116.99 (83.36, 150.62) | 116.21 (106.16, 126.26) | 125.18 (110.32, 140.04) | 131.53 (115.71, 147.34) | 0.364 |
| >3 | 112.63 (98.3, 126.95) | 111.14 (101.46, 120.82) | 104.66 (94.67, 114.65) | 112.49 (100.99, 124) | 0.788 |
| Homeostatic Model Assessment for Insulin Resistance | Age | Elderly | 3.79 (2.91, 4.67) | 4.87 (4.36, 5.39) | 5.05 (4.18, 5.92) | 4.66 (3.7, 5.63) | 0.233 | 0.489 |
| Non-Elderly | 3.58 (3.14, 4.02) | 3.72 (3.43, 4.01) | 3.9 (3.41, 4.4) | 3.98 (3.33, 4.62) | 0.259 |
| Race | Mexican American | 4.21 (3.72, 4.7) | 4.37 (3.47, 5.27) | 6.83 (3.18, 10.48) | 5.47 (3.46, 7.49) | 0.065 | 0.371 |
| Non-Hispanic Black | 3.7 (3.25, 4.16) | 4.24 (3.6, 4.88) | 3.91 (3.37, 4.46) | 4.48 (3.01, 5.96) | 0.397 |
| Non-Hispanic White | 3.42 (3.09, 3.74) | 3.92 (3.61, 4.24) | 3.89 (3.37, 4.41) | 3.95 (3.43, 4.47) | 0.113 |
| Other Hispanic | 5.33 (1.91, 8.75) | 4.06 (3.4, 4.73) | 3.74 (3.15, 4.34) | 5.11 (4.02, 6.19) | 0.983 |
| Other Race - Including Multi-Racial | 3.35 (2.01, 4.7) | 3.2 (2.84, 3.56) | 3.61 (3.21, 4) | 3.19 (2.67, 3.71) | 0.969 |
| Gender | Female | 3.28 (3.02, 3.53) | 3.5 (3.16, 3.84) | 3.89 (3.37, 4.41) | 3.85 (3.45, 4.25) | 0.009 | 0.765 |
| Male | 3.97 (3.27, 4.67) | 4.4 (4.05, 4.74) | 4.34 (3.71, 4.97) | 4.42 (3.67, 5.18) | 0.421 |
| Education | College or above | 2.69 (2.38, 2.99) | 3.43 (3.06, 3.81) | 3.09 (2.56, 3.63) | 3.41 (2.63, 4.19) | 0.208 | 0.209 |
| High school graduate | 3.38 (2.82, 3.94) | 4.67 (3.58, 5.76) | 5.32 (3.8, 6.84) | 4.74 (3.63, 5.85) | 0.043 |
| Less than high school | 3.84 (3.33, 4.35) | 3.98 (3.39, 4.58) | 4.78 (4.13, 5.42) | 4.76 (4.12, 5.39) | 0.009 |
| Some college or associates degree | 4.48 (3.65, 5.31) | 3.89 (3.22, 4.56) | 4.03 (3.54, 4.53) | 4.34 (3.55, 5.13) | 0.856 |
| Family poverty-to-income ratio | >=0,<=1 | 3.97 (3.1, 4.84) | 4 (3.54, 4.46) | 5.84 (3.11, 8.57) | 4.23 (3.48, 4.99) | 0.229 | 0.219 |
| >1,<=3 | 3.98 (3.5, 4.47) | 3.85 (3.45, 4.25) | 4.69 (4.07, 5.3) | 4.39 (3.66, 5.12) | 0.115 |
| >3 | 3.23 (2.69, 3.76) | 3.99 (3.57, 4.4) | 3.43 (2.96, 3.89) | 3.95 (2.98, 4.91) | 0.383 |
| Homeostatic Model Assessment for Insulin Sensitivity | Age | Elderly | 0.6 (0.54, 0.65) | 0.46 (0.42, 0.5) | 0.44 (0.4, 0.47) | 0.51 (0.48, 0.55) | 0.038 | 0.031 |
| Non-Elderly | 0.61 (0.57, 0.65) | 0.55 (0.5, 0.59) | 0.57 (0.53, 0.6) | 0.57 (0.51, 0.63) | 0.352 |
| Race | Mexican American | 0.45 (0.4, 0.5) | 0.42 (0.38, 0.46) | 0.39 (0.35, 0.43) | 0.41 (0.33, 0.49) | 0.181 | 0.072 |
| Non-Hispanic Black | 0.75 (0.65, 0.85) | 0.56 (0.5, 0.62) | 0.61 (0.53, 0.68) | 0.51 (0.45, 0.57) | <0.001 |
| Non-Hispanic White | 0.6 (0.55, 0.65) | 0.54 (0.49, 0.59) | 0.56 (0.51, 0.6) | 0.59 (0.52, 0.66) | 0.874 |
| Other Hispanic | 0.51 (0.39, 0.64) | 0.48 (0.42, 0.54) | 0.51 (0.46, 0.57) | 0.47 (0.42, 0.52) | 0.646 |
| Other Race - Including Multi-Racial | 0.71 (0.56, 0.87) | 0.54 (0.47, 0.61) | 0.53 (0.48, 0.58) | 0.55 (0.48, 0.63) | 0.081 |
| Gender | Female | 0.61 (0.55, 0.67) | 0.55 (0.51, 0.6) | 0.54 (0.5, 0.57) | 0.56 (0.53, 0.6) | 0.15 | 0.715 |
| Male | 0.6 (0.53, 0.67) | 0.5 (0.46, 0.55) | 0.54 (0.49, 0.6) | 0.55 (0.46, 0.63) | 0.455 |
| Education | College or above | 0.71 (0.63, 0.8) | 0.58 (0.51, 0.66) | 0.62 (0.57, 0.67) | 0.68 (0.58, 0.78) | 0.866 | 0.306 |
| High school graduate | 0.6 (0.54, 0.66) | 0.51 (0.46, 0.56) | 0.47 (0.43, 0.51) | 0.49 (0.45, 0.53) | 0.003 |
| Less than high school | 0.54 (0.46, 0.63) | 0.51 (0.46, 0.56) | 0.47 (0.42, 0.52) | 0.47 (0.42, 0.53) | 0.13 |
| Some college or associates degree | 0.56 (0.47, 0.66) | 0.51 (0.45, 0.56) | 0.54 (0.49, 0.58) | 0.48 (0.45, 0.52) | 0.22 |
| Family poverty-to-income ratio | >=0,<=1 | 0.54 (0.5, 0.58) | 0.5 (0.46, 0.53) | 0.51 (0.47, 0.55) | 0.54 (0.46, 0.61) | 0.851 | 0.449 |
| >1,<=3 | 0.59 (0.5, 0.68) | 0.55 (0.49, 0.6) | 0.5 (0.46, 0.54) | 0.55 (0.44, 0.66) | 0.443 |
| >3 | 0.65 (0.59, 0.7) | 0.53 (0.47, 0.58) | 0.57 (0.52, 0.63) | 0.56 (0.53, 0.6) | 0.095 |
