# Supplementary material for: Shifts in Metabolic Biomarkers Related to Cardiovascular Disease and Diabetes from 2013 to 2023: A Decade of Change, Including the COVID-19 Era
Source: Research Square preprint supplement (doi:10.21203/rs.3.rs-5704576/v1), 2025-01-02

A

Trend of fasting total cholesterol across different levels in age

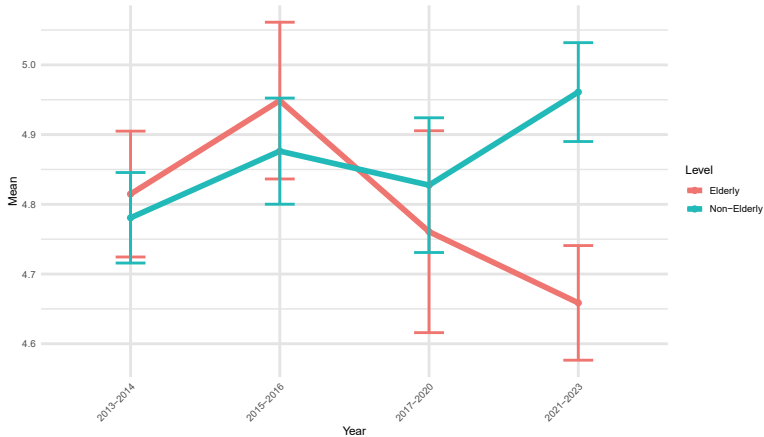

B

Trend of fasting total cholesterol across different levels in education

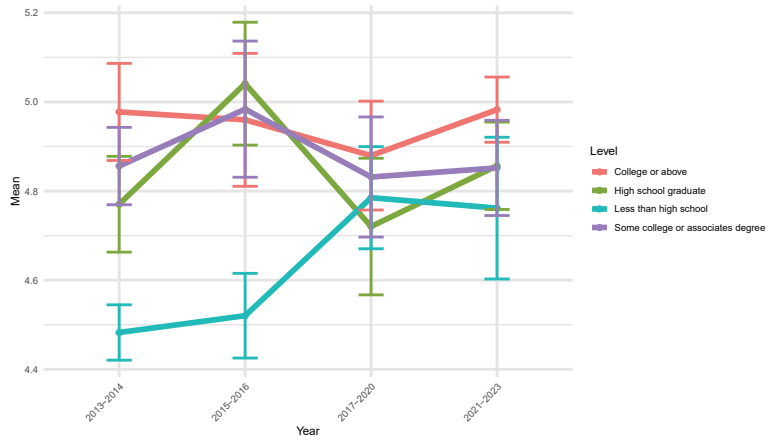

Supplement: Supplementary file 4 [file cab5e7ee63ec3d8c4552309e.pdf]
