# Supplementary figures and images for: Shifts in Metabolic Biomarkers Related to Cardiovascular Disease and Diabetes from 2013 to 2023: A Decade of Change, Including the COVID-19 Era
Source: Research Square preprint supplement (doi:10.21203/rs.3.rs-5704576/v1), 2025-01-02

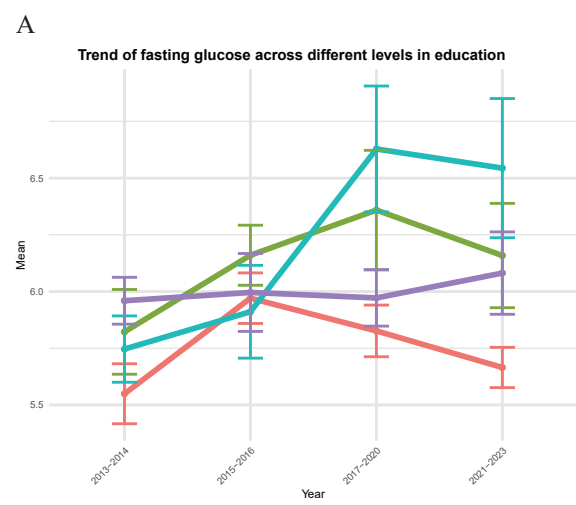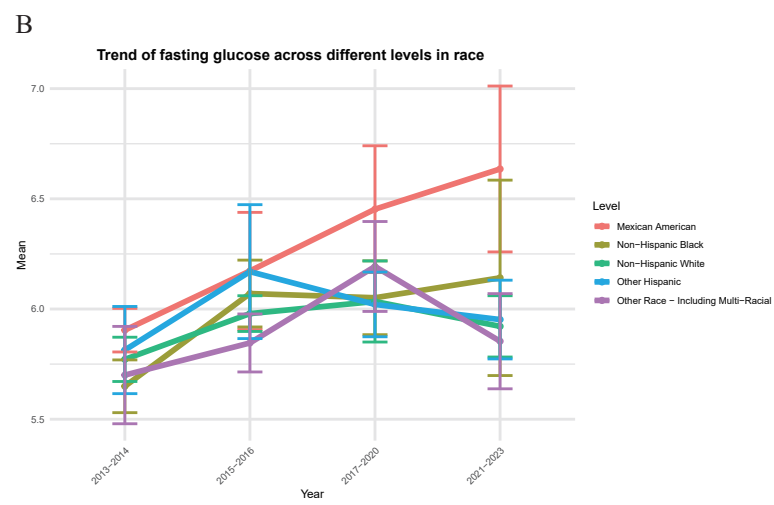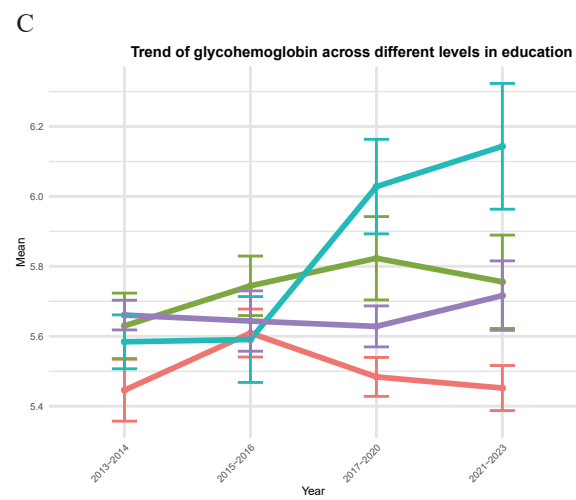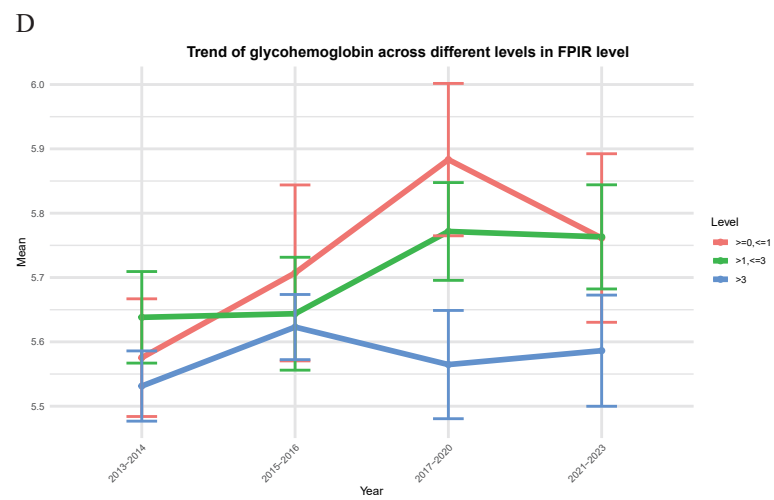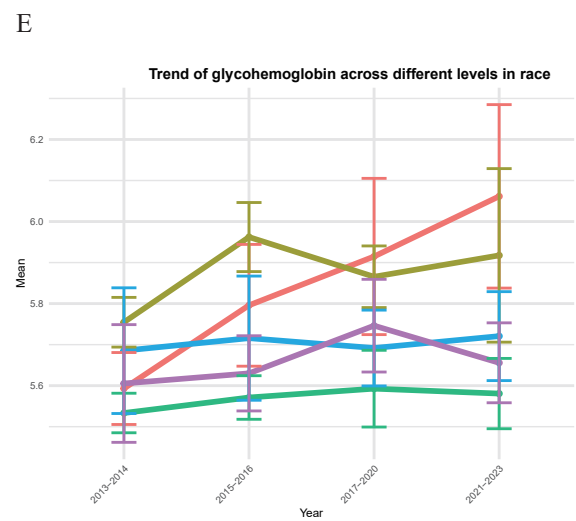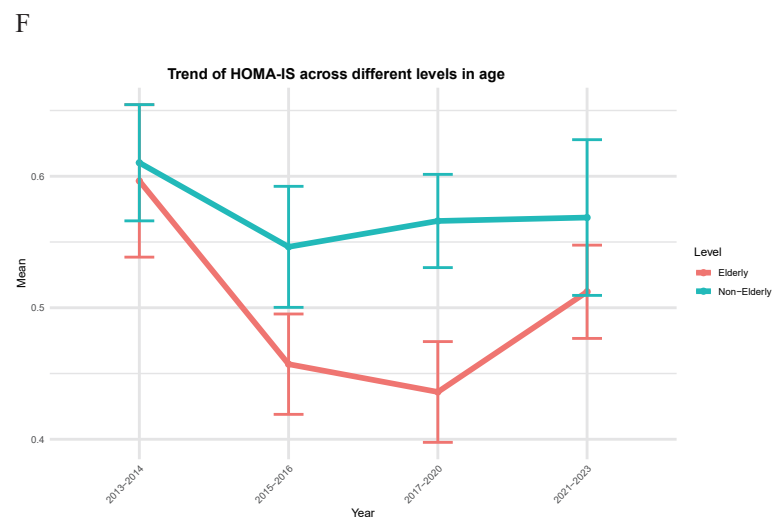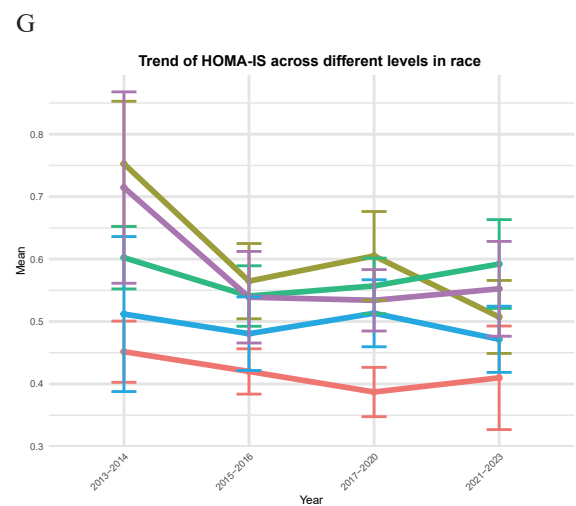

Supplement: Supplementary file 1 [file 220e1baf5037e21a13854400.pdf]

A

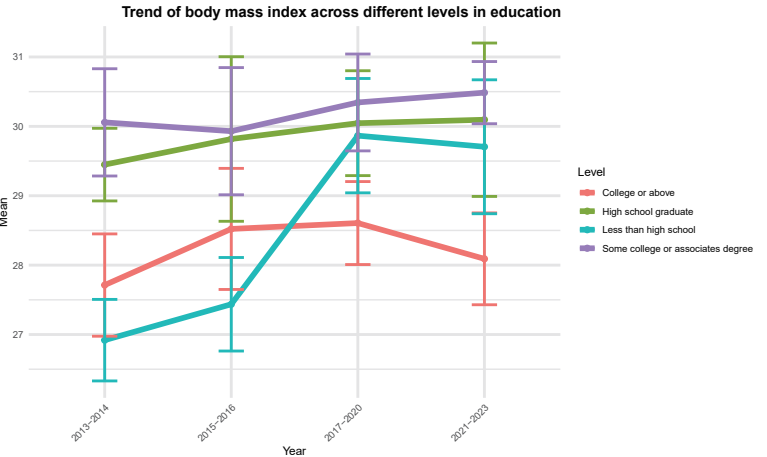

B

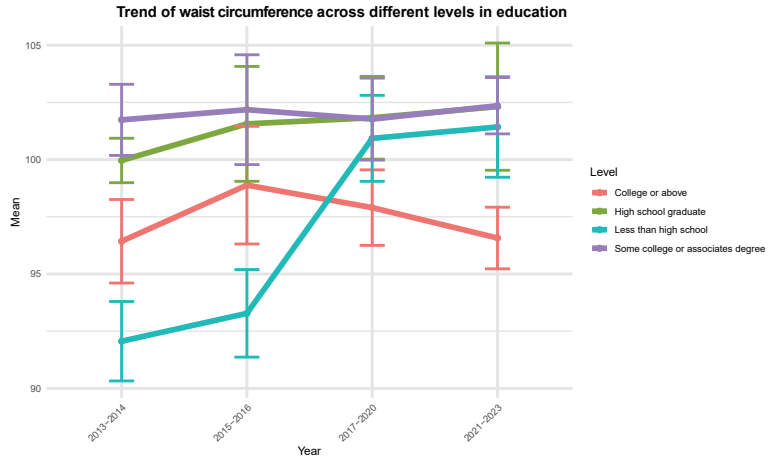

C

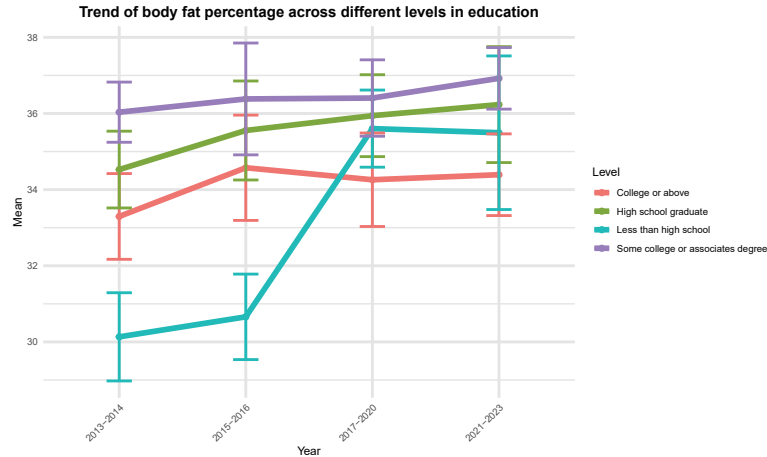

D

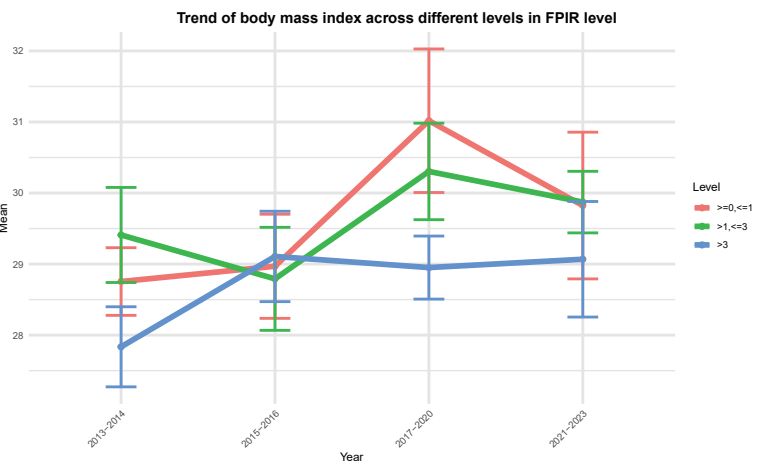

E

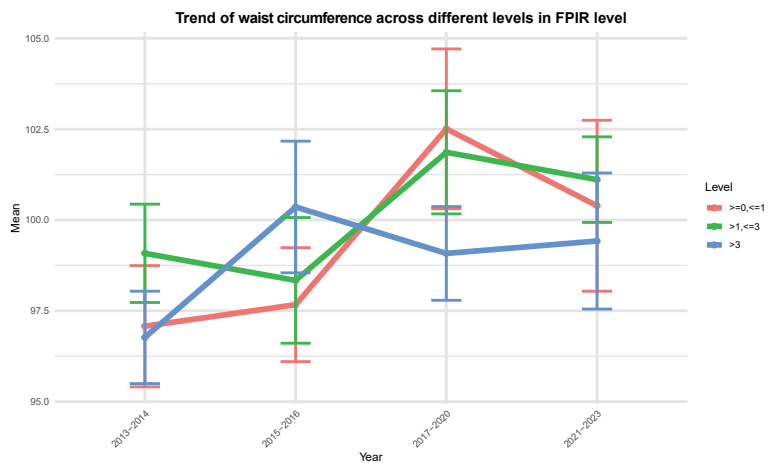

F

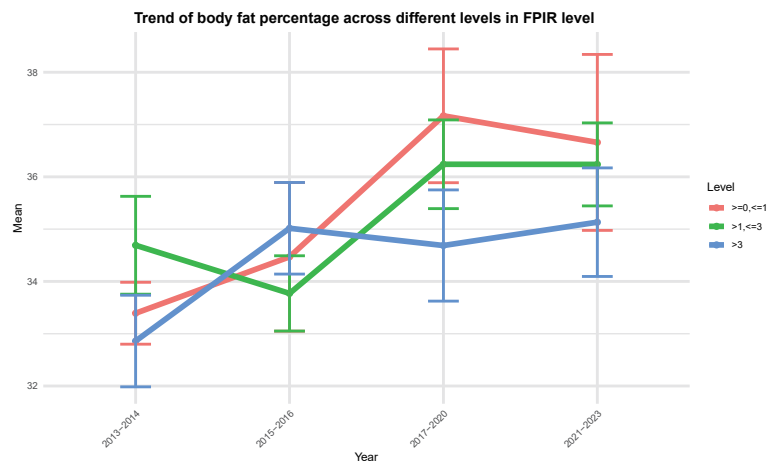

Supplement: Supplementary file 2 [file 32dbdd927cd122d6d925ae30.pdf]

A

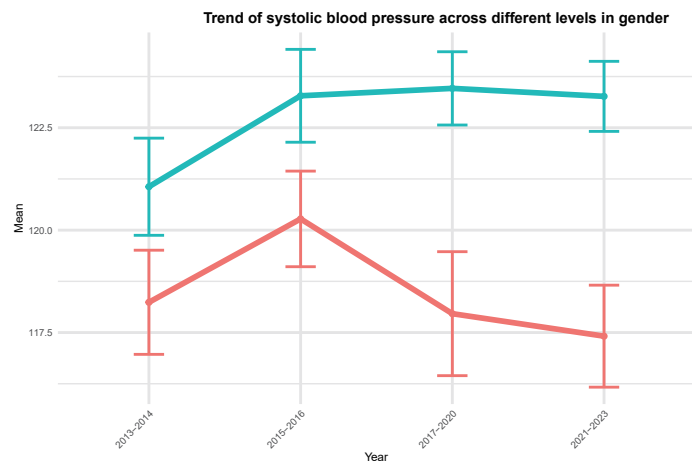

B

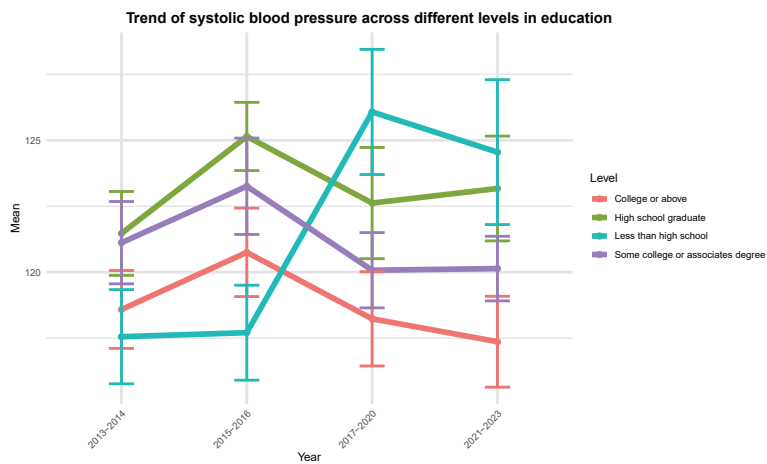

C

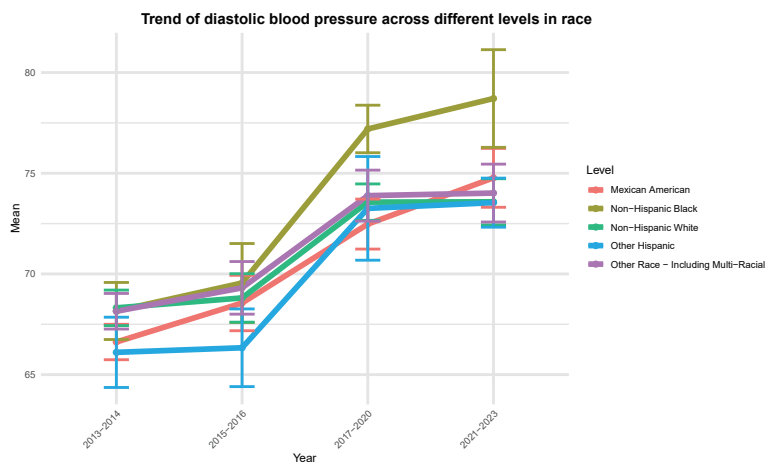

D

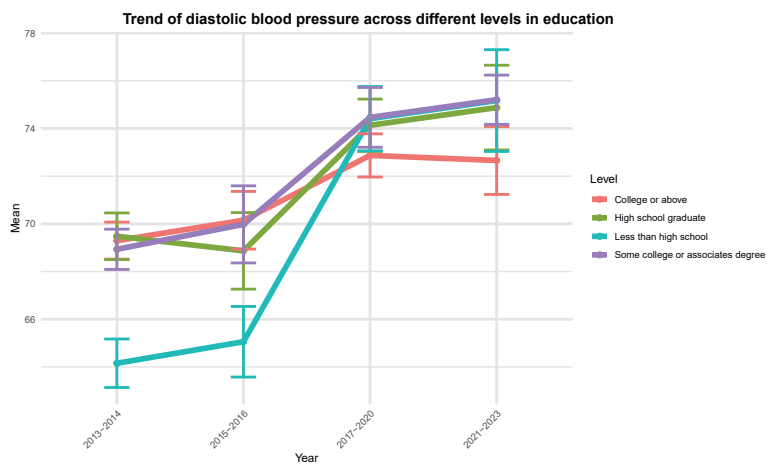

E

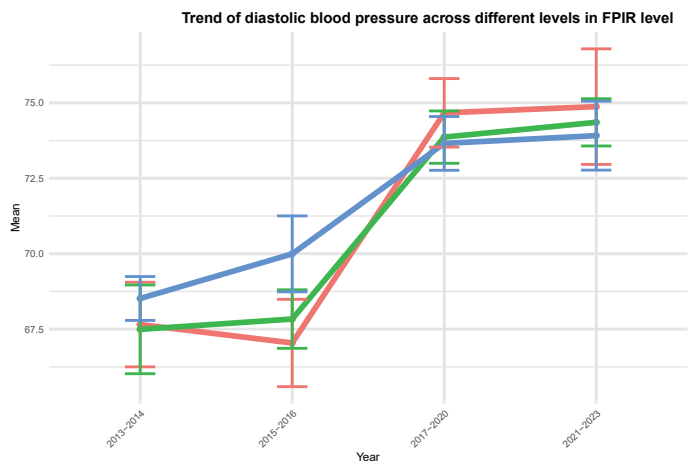

F

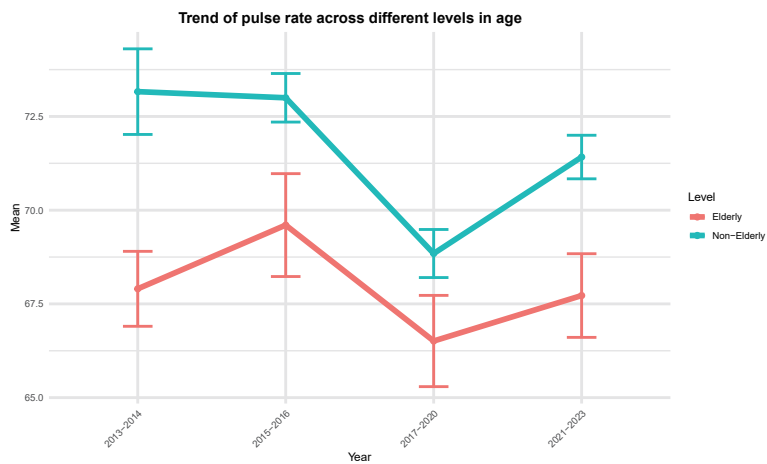

G

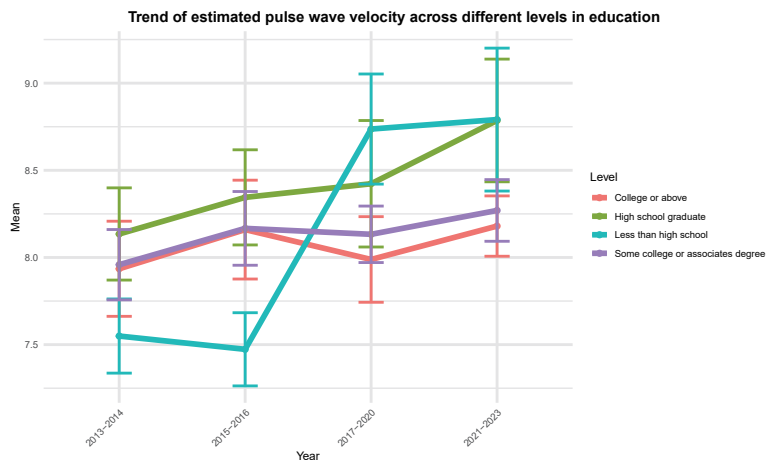

H

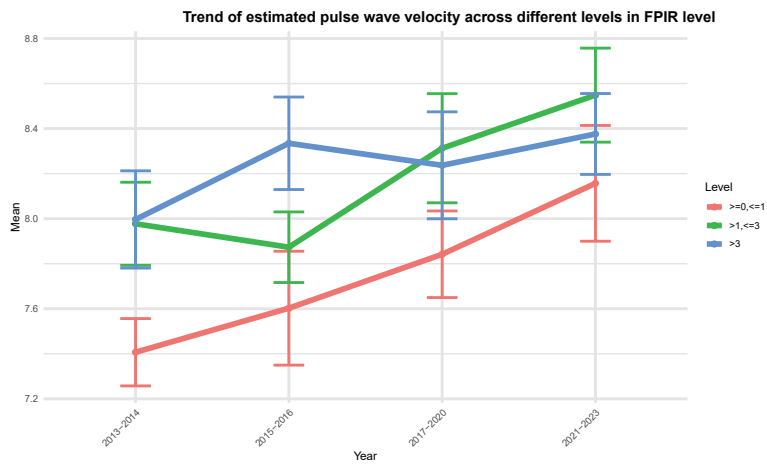

Supplement: Supplementary file 3 [file 4a14335bb6aa2acf377e2fbe.pdf]
